# Supplementary material for: Evaluation of Different Cooking Conditions on Broccoli (Brassica oleracea var. italica) to Improve the Nutritional Value and Consumer Acceptance
Source: Springer Nature journal article supplement (doi:10.1007/s11130-014-0420-2), 2014-05-22
Supplement: 11130_2014_420_MOESM1_ESM.pdf [file 11130_2014_420_MOESM1_ESM.pdf]

# Evaluation of different cooking conditions on broccoli (*Brassica oleracea* var. *italica*) to improve the nutritional value and consumer acceptance

Plant Foods for Human Nutrition

Radhika Bongoni\*, Ruud Verkerk, Bea Steenbekkers, Matthijs Dekker, Markus Stieger

Food Quality and Design, Wageningen University, 6700 AA, The Netherlands

\*E: [radhika.bongoni@wur.nl](mailto:radhika.bongoni@wur.nl), [bongoni.radhika@gmail.com](mailto:bongoni.radhika@gmail.com); T: +31 317 48 20 86

## Appendix 1 Attributes, their definitions and anchors used for the sensory evaluation of cooked broccoli

| Attribute        | Definition                                                                   | Anchors                                                                                   |
|------------------|------------------------------------------------------------------------------|-------------------------------------------------------------------------------------------|
| Greenness        | The intensity of the green colour of the broccoli floret.                    | Low (low in greenness) – High (very green)                                                |
| Firmness         | The force needed to chew the sample between molar teeth after chewing twice. | Low (very soft) – High (very firm)                                                        |
| Juiciness        | The amount of juice that is released while chewing.                          | Low (very little juice) – High (very juicy)                                               |
| Broccoli flavour | The overall intensity of typical broccoli flavour.                           | Low (very low in typical broccoli flavour) – High (very high in typical broccoli flavour) |
| Sweetness        | Taste sensation of which sugar is typical                                    | Low (very low in sweetness) – High (very sweet)                                           |
| Bitterness       | Taste sensation of which caffeine is typical                                 | Low (very low in bitterness) – High (very bitter)                                         |
